# Supplementary figures and images for: Efficacy of Functional Remediation in Bipolar Disorder: A Multicenter Randomized Controlled Study
Source: Atypon-hosted journal article supplement (doi:10.1176/appi.ajp.2012.12070971), 2013-03-20

**FIGURE S1.** Patients' Disposition

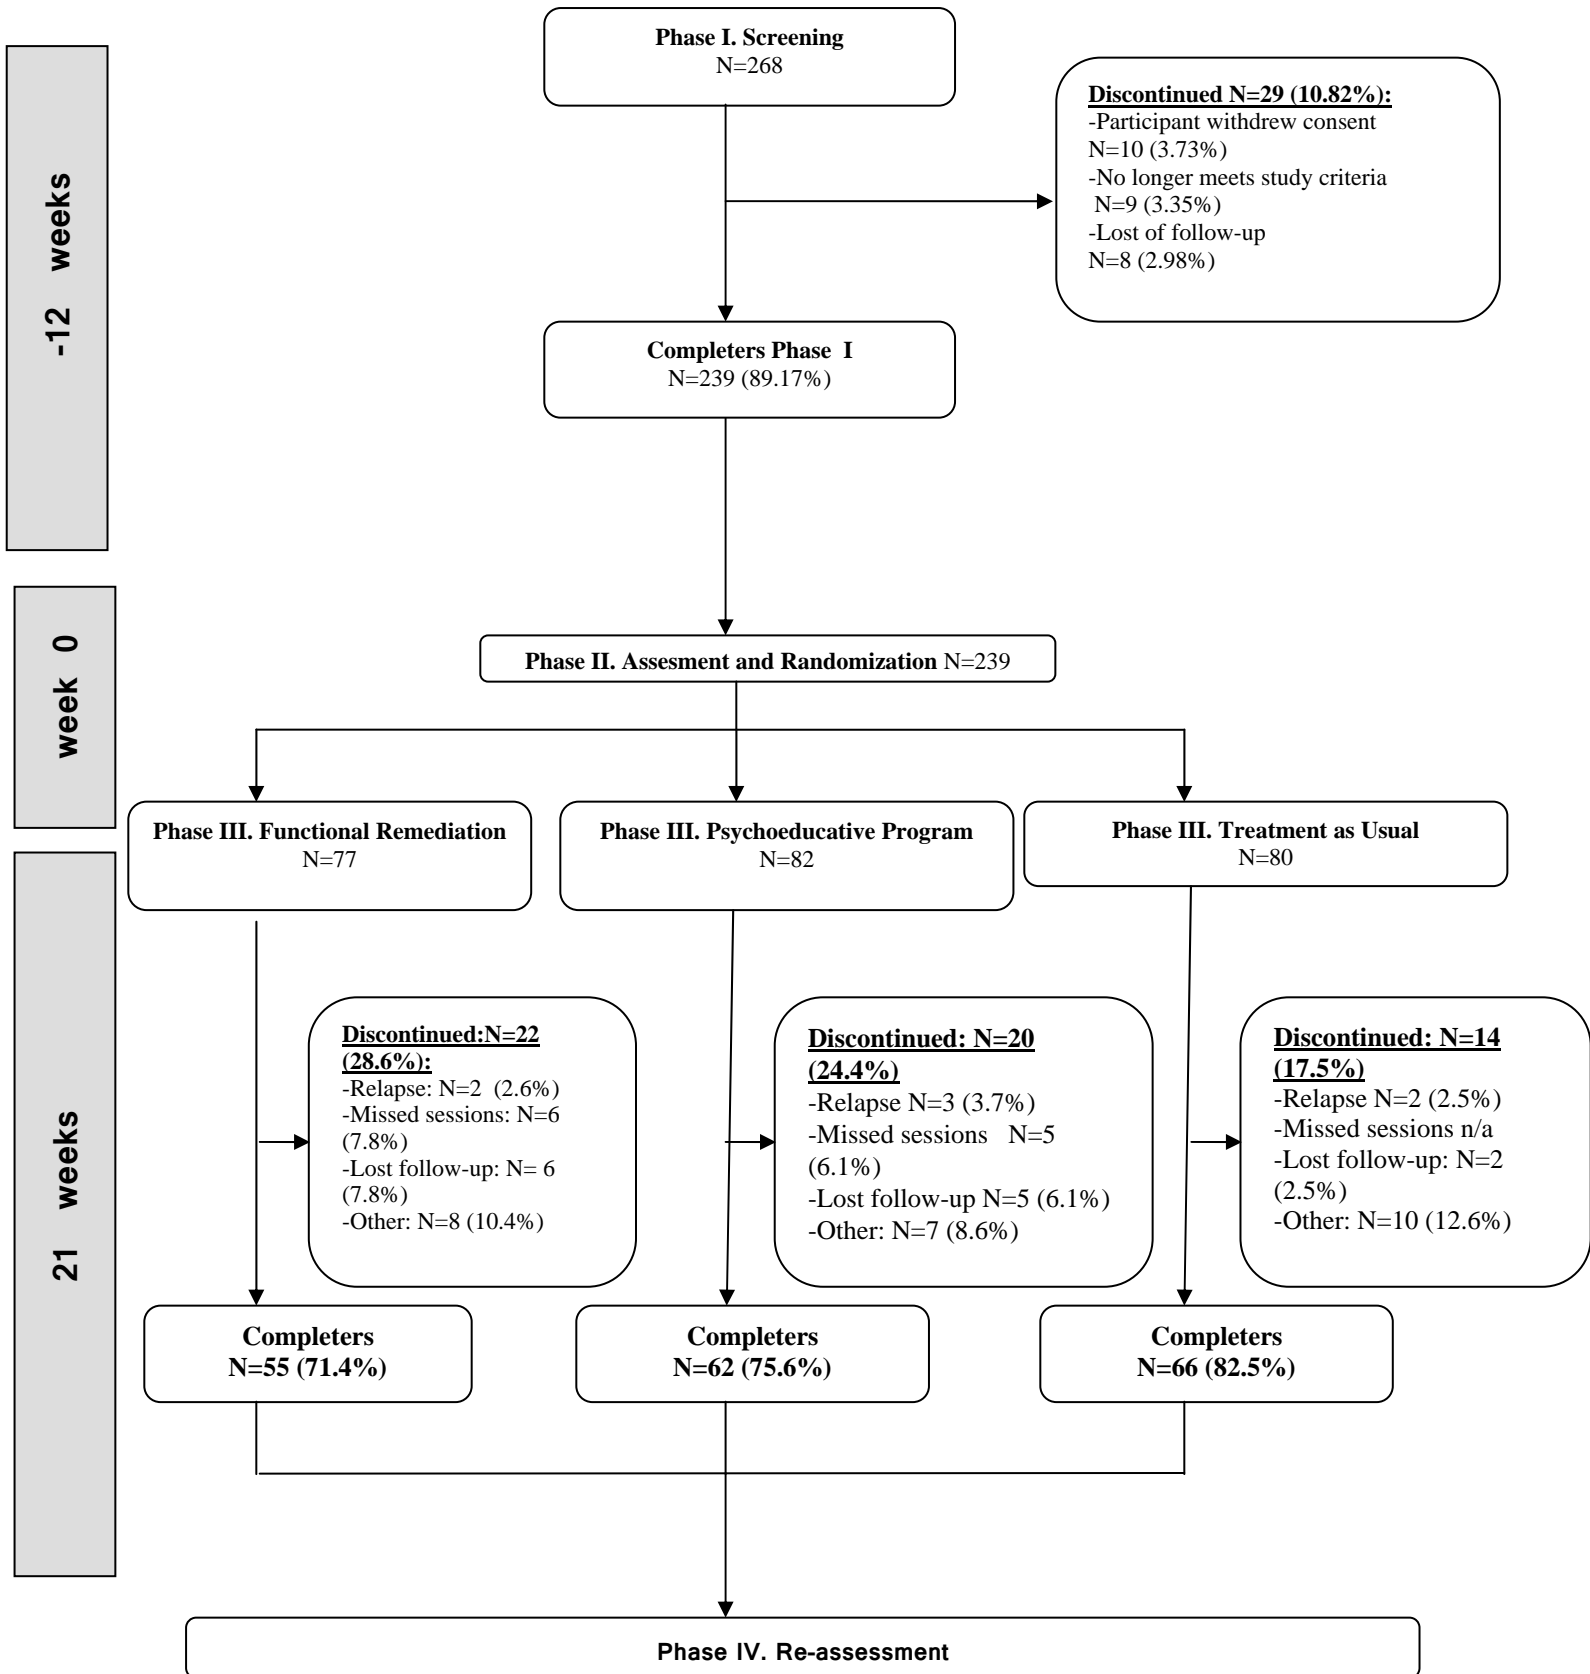

Supplement: 852_ds001.pdf [file 852_ds001.pdf]
